# Supplementary material for: Repeated divergent selection on pigmentation genes in a rapid finch radiation
Source: PubMed Central journal article supplement — Sci Adv. 2017 May 24;3(5):e1602404. doi: 10.1126/sciadv.1602404 (PMC5443641; doi:10.1126/sciadv.1602404), 2017-05-24
Supplement: 1602404_SM.pdf [file 1602404_SM.pdf]

## Supplementary Materials for

### Repeated divergent selection on pigmentation genes in a rapid finch radiation

Leonardo Campagna, Márcio Repenning, Luís Fábio Silveira, Carla Suertegaray Fontana, Pablo L. Tubaro, Irby J. Lovette

Published 24 May 2017, *Sci. Adv.* **3**, e1602404 (2017)  
DOI: 10.1126/sciadv.1602404

#### **This PDF file includes:**

- fig. S1. Clustering of individuals by species.
- fig. S2. Genomic landscapes of differentiation in 10 pairwise comparisons of five species.
- fig. S3. Repeated selection on pigmentation genes in different capuchino species II.
- fig. S4. Absolute sequence divergence inside and outside of peak areas.
- fig. S5. MC1R is not differentiated in capuchinos.
- fig. S6. Structural variants found comparing two capuchino species (hypox and pil).
- table S1. Details on the samples used in this study.

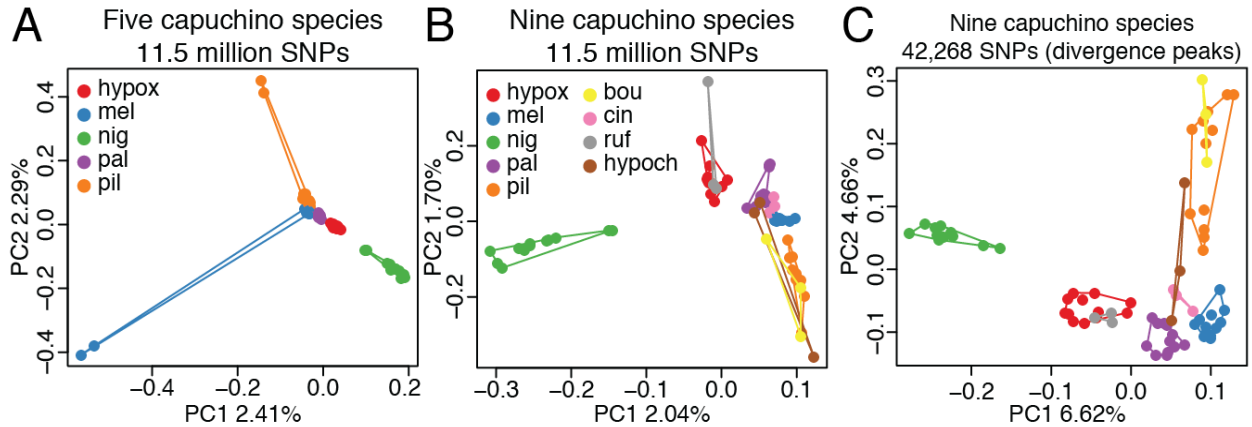

**fig. S1. Clustering of individuals by species.** (A) PCA including 60 individuals of five species genotyped at ~11.5 million SNPs. The percentages of variation explained by PC1 and PC2 are indicated on each axis. The four individuals (two pil and two mel) that are divergent from the remaining birds of their species were omitted from the PCA in Fig. 1A. Note that despite being divergent, these birds did not overlap with other species. The outlier birds were males that did not show an unusual phenotype with respect to other birds of their species. Their average depth of coverage, alignment rates and mapping quality were comparable to other samples included in this study. (B) PCA including 68 individuals of nine species genotyped for the SNPs in (A). This PCA includes three individuals of bou, cin, hypoch and ruf which show some overlap with the species with larger sample sizes (nig, pil, pal, hypox, mel). The four outlier individuals mentioned above were also removed before conducting this PCA. (C) PCA including 72 individuals of nine species genotyped for the ~42 thousand SNPs found under the 25 divergence peaks identified in nig, pil, pal, hypox, and mel. We observe some overlap especially between hypox and ruf (red and gray) and pil and bou (orange and yellow). It is possible that there are divergent areas of the genome between these overlapping species that we have not identified because we did not use the species with small sample sizes to find peaks.

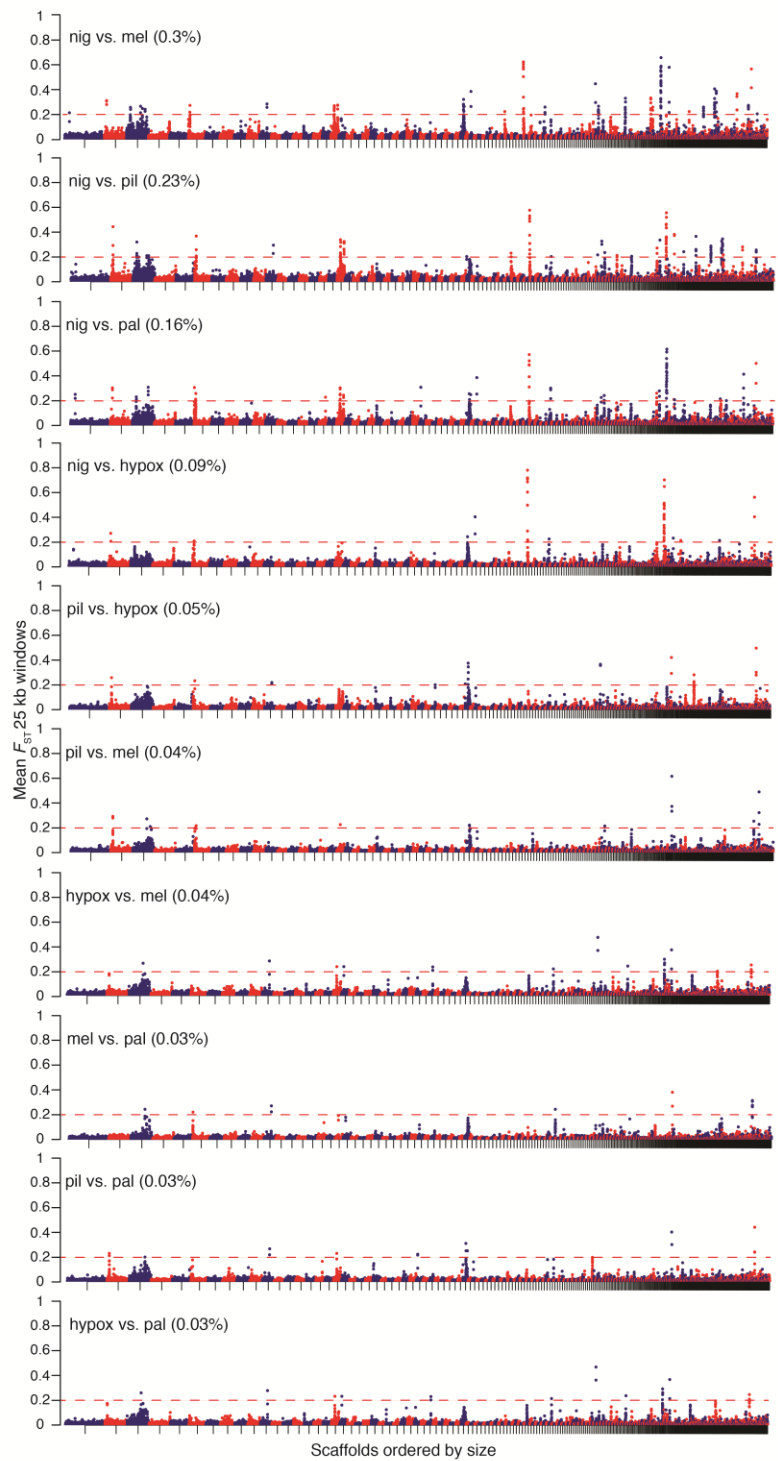

**fig. S2. Genomic landscapes of differentiation in 10 pairwise comparisons of five species.** Manhattan plots for all the possible comparisons among five species. We sorted the comparisons by decreasing percentage of non-overlapping 25 kb windows that are elevated above the established threshold. Other details as in Fig. 1C.

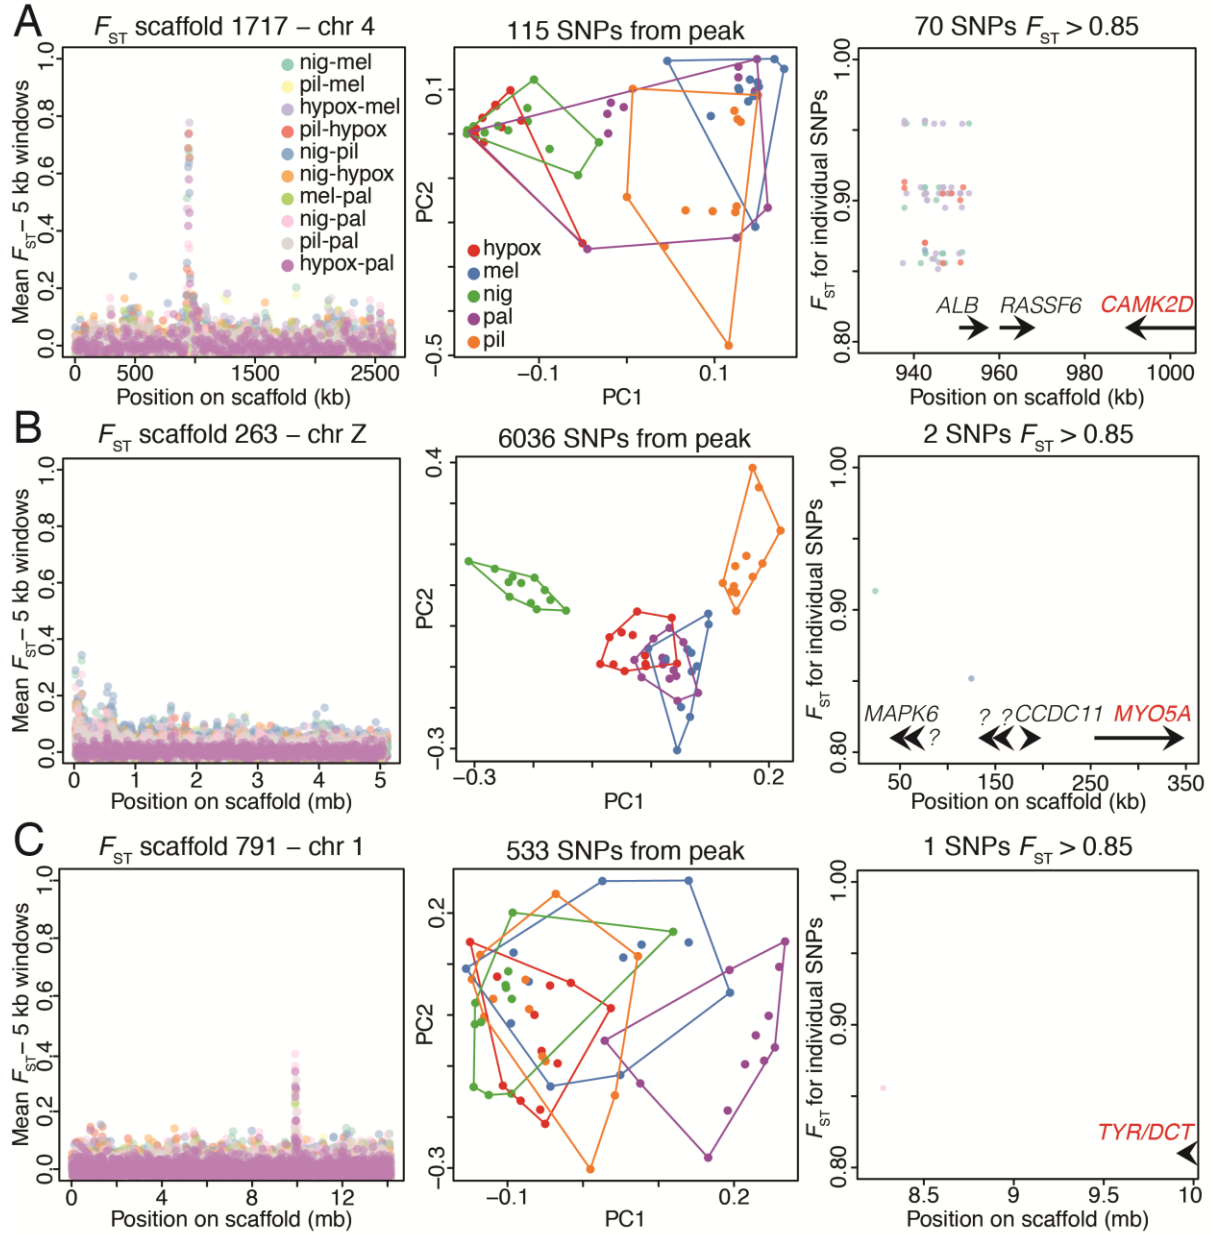

**fig. S3. Repeated selection on pigmentation genes in different capuchino species II.** (A) Divergence peak for scaffold 1717 (left), PCA obtained from SNPs under the peak (center), and  $F_{ST}$  values for highly divergent SNPs with gene annotations (right). Annotations in red correspond to genes in the melanogenesis pathway (see Table 1). Other details as in Fig. 2. (B and C) Same as above for peaks on scaffold 263 and 791, respectively. The annotation in the right panel of (C) was based on partial protein similarity with both the *TYR* and *DCT* gene products.

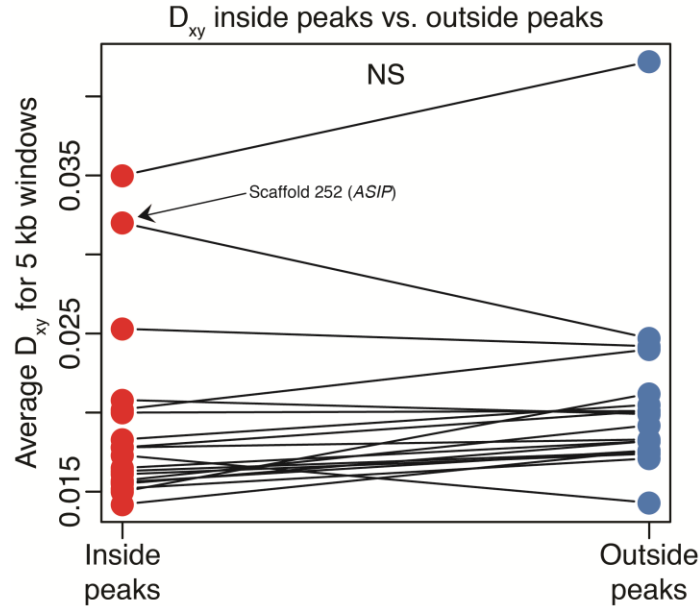

**fig. S4. Absolute sequence divergence inside and outside of peak areas.** On average the absolute sequence divergence (measured by  $D_{xy}$ ) did not differ between the regions under divergence peaks and those outside of these areas on the same scaffold ( $t = -1.9889$ ,  $df = 18$ ,  $P = 0.06214$ ). We conducted this analysis for the two taxa showing the largest divergence (nig vs mel) and did not treat multiple peaks on the same scaffold as independent. Note that the greatest increase in sequence divergence inside a peak (compared to outside of this region) corresponds to scaffold 252, which contains *ASIP*.

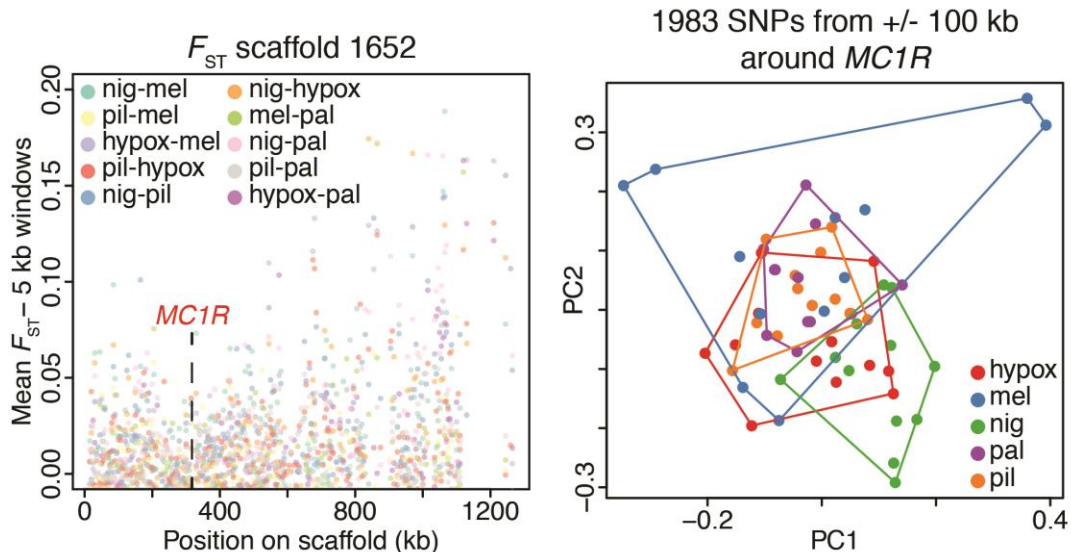

**fig. S5. *MC1R* is not differentiated in capuchinos.** The region of scaffold 1652 containing *MC1R* does not show differences in the five southern capuchino species that we studied. Details as in Fig 2.

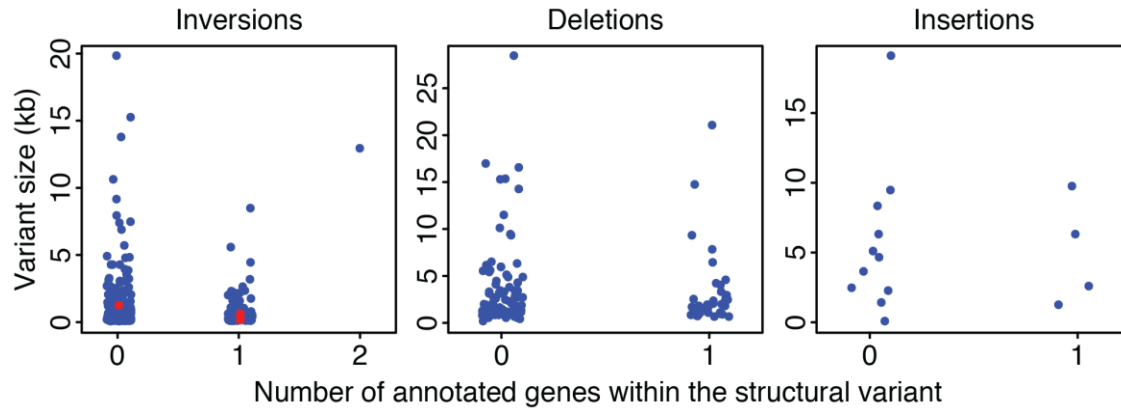

**fig. S6. Structural variants found comparing two capuchino species (hypox and pil).**

Putative inversions, deletions and insertions present in pil that were found in a comparison to the hypox reference genome. We identified the number of annotated genes that were encompassed by the different rearrangements. The red dots indicate the four structural variants that were located in divergence peaks.

**table S1. Details on the samples used in this study.**

| Species              | Catalogue number <sup>a</sup> | Collection year | Locality                                               | Latitude | Longitude | Sex |
|----------------------|-------------------------------|-----------------|--------------------------------------------------------|----------|-----------|-----|
| <i>S. bouvreuil</i>  | MZUSP 1158                    | -               | Captive; Brazil                                        | -        | -         | M   |
| <i>S. bouvreuil</i>  | MZUSP 84088                   | 2009            | Fazenda Fartura, Santana do Araguaia, Pará, Brazil     | -9.30    | -50.29    | M   |
| <i>S. bouvreuil</i>  | MZUSP 85409                   | 2009            | Fazenda Eldorado, Barra do Garças, Mato Grosso, Brazil | -15.58   | -52.22    | M   |
| <i>S. pileata</i>    | KUNHM 3664                    | 1996            | San Rafael National Park, Itapuá, Paraguay             | -26.52   | -55.80    | M   |
| <i>S. pileata</i>    | KUNHM 3687                    | 1996            | San Rafael National Park, Itapuá, Paraguay             | -26.52   | -55.80    | M   |
| <i>S. pileata</i>    | KUNHM 3691                    | 1996            | San Rafael National Park, Itapuá, Paraguay             | -26.52   | -55.80    | M   |
| <i>S. pileata</i>    | KUNHM 3699                    | 1996            | San Rafael National Park, Itapuá, Paraguay             | -26.52   | -55.80    | M   |
| <i>S. pileata</i>    | MACN 6537                     | 2012            | Captive; Argentina                                     | -        | -         | M   |
| <i>S. pileata</i>    | MZUSP 77832                   | 2007            | Santa Gertrudes, São Paulo, Brazil                     | -22.46   | -47.53    | M   |
| <i>S. pileata</i>    | MCP 3627                      | 2013            | Itararé, São Paulo, Brazil                             | -24.11   | -49.33    | M   |
| <i>S. pileata</i>    | MCP 3628                      | 2013            | Itararé, São Paulo, Brazil                             | -24.11   | -49.33    | M   |
| <i>S. pileata</i>    | MCP 4222                      | 2013            | Chapadão do Céu, Goiás, Brazil                         | -18.40   | -52.67    | M   |
| <i>S. pileata</i>    | MCP 4850                      | 2012            | Broa, São Paulo, Brazil                                | -22.20   | -47.87    | M   |
| <i>S. pileata</i>    | MCP 4851                      | 2013            | Dourado, São Paulo, Brazil                             | -22.12   | -48.34    | M   |
| <i>S. pileata</i>    | MCP 4852                      | 2013            | Dourado, São Paulo, Brazil                             | -22.12   | -48.34    | M   |
| <i>S. hypoxantha</i> | MACN 3103                     | 2005            | El Bagual, Formosa, Argentina                          | -26.17   | -58.93    | M   |
| <i>S. hypoxantha</i> | MACN 3105                     | 2005            | El Bagual, Formosa, Argentina                          | -26.17   | -58.93    | M   |
| <i>S. hypoxantha</i> | MACN 4970                     | 2009            | El Bagual, Formosa, Argentina                          | -26.17   | -58.93    | M   |
| <i>S. hypoxantha</i> | MACN 4971                     | 2008            | El Bagual, Formosa, Argentina                          | -26.17   | -58.93    | M   |
| <i>S. hypoxantha</i> | MACN 4972                     | 2008            | El Bagual, Formosa, Argentina                          | -26.17   | -58.93    | M   |
| <i>S. hypoxantha</i> | MACN 3098                     | 2005            | El Bagual, Formosa, Argentina                          | -26.17   | -58.93    | M   |
| <i>S. hypoxantha</i> | MACN 4975                     | 2009            | El Bagual, Formosa, Argentina                          | -26.17   | -58.93    | M   |
| <i>S. hypoxantha</i> | MACN 3254                     | 2007            | El Bagual, Formosa, Argentina                          | -26.17   | -58.93    | M   |
| <i>S. hypoxantha</i> | MACN 5177                     | 2009            | Iberá, Corrientes, Argentina                           | -27.86   | -56.70    | M   |
| <i>S. hypoxantha</i> | MACN 5234                     | 2009            | Iberá, Corrientes, Argentina                           | -27.86   | -56.70    | M   |
| <i>S. hypoxantha</i> | MACN 3272                     | 2007            | Estero Catalina, Formosa, Argentina                    | -25.11   | -58.15    | M   |
| <i>S. hypoxantha</i> | MACN 3258                     | 2007            | El Bagual, Formosa, Argentina                          | -26.17   | -58.93    | M   |

|                        |             |      |                                                          |        |        |   |
|------------------------|-------------|------|----------------------------------------------------------|--------|--------|---|
| <i>S. melanogaster</i> | MCP 2312    | 2008 | Bom Jesus, Rio Grande do Sul, Brazil                     | -28.66 | -50.44 | M |
| <i>S. melanogaster</i> | MCP 2318    | 2008 | Bom Jesus, Rio Grande do Sul, Brazil                     | -28.66 | -50.44 | M |
| <i>S. melanogaster</i> | MCP 2073    | 2007 | Bom Jesus, Rio Grande do Sul, Brazil                     | -28.66 | -50.44 | F |
| <i>S. melanogaster</i> | MCP 2074    | 2007 | Bom Jesus, Rio Grande do Sul, Brazil                     | -28.66 | -50.44 | M |
| <i>S. melanogaster</i> | MCP 2076    | 2007 | Bom Jesus, Rio Grande do Sul, Brazil                     | -28.66 | -50.44 | M |
| <i>S. melanogaster</i> | MCP 2078    | 2008 | Bom Jesus, Rio Grande do Sul, Brazil                     | -28.66 | -50.44 | M |
| <i>S. melanogaster</i> | MCP 2296    | 2007 | Bañado Água Branca, Bom Jesus, Rio Grande do Sul, Brazil | -28.60 | -50.41 | M |
| <i>S. melanogaster</i> | MCP 2298    | 2007 | Bañado Água Branca, Bom Jesus, Rio Grande do Sul, Brazil | -28.60 | -50.41 | M |
| <i>S. melanogaster</i> | MCP 2306    | 2006 | Bañado Rio Santana, Bom Jesus, Rio Grande do Sul Brazil  | -28.48 | -50.72 | M |
| <i>S. melanogaster</i> | MCP 2311    | 2008 | Bañado Água Branca, Bom Jesus, Rio Grande do Sul Brazil  | -28.60 | -50.41 | M |
| <i>S. melanogaster</i> | MCP 2315    | 2008 | Coxilha Rica, Lages Santa Catarina, Brazil               | -28.31 | -50.28 | M |
| <i>S. melanogaster</i> | MCP 2075    | 2007 | Bom Jesus, Rio Grande do Sul, Brazil                     | -28.66 | -50.44 | M |
| <i>S. palustris</i>    | MACN 3118   | 2006 | Iberá, Corrientes, Argentina                             | -27.86 | -56.7  | M |
| <i>S. palustris</i>    | MZUSP 94877 | -    | Captive; Brazil                                          | -      | -      | M |
| <i>S. palustris</i>    | MACN 5173   | 2009 | Iberá, Corrientes, Argentina                             | -27.86 | -56.7  | M |
| <i>S. palustris</i>    | MACN 5175   | 2009 | Iberá, Corrientes, Argentina                             | -27.86 | -56.7  | M |
| <i>S. palustris</i>    | MACN 5178   | 2009 | Iberá, Corrientes, Argentina                             | -27.86 | -56.7  | M |
| <i>S. palustris</i>    | MACN 5179   | 2009 | Iberá, Corrientes, Argentina                             | -27.86 | -56.7  | M |
| <i>S. palustris</i>    | MACN 5168   | 2009 | Iberá, Corrientes, Argentina                             | -27.86 | -56.7  | M |
| <i>S. palustris</i>    | MACN 5240   | 2009 | Iberá, Corrientes, Argentina                             | -27.86 | -56.7  | M |
| <i>S. palustris</i>    | MCP NN1     | -    | Captive; Brazil                                          | -      | -      | M |
| <i>S. palustris</i>    | MCP NN2     | -    | Captive; Brazil                                          | -      | -      | M |
| <i>S. palustris</i>    | MACN 3117   | 2007 | Guauguaychú, Entre Ríos, Argentina                       | -33.01 | -58.52 | M |
| <i>S. palustris</i>    | MACN 3372   | 2007 | Guauguaychú, Entre Ríos, Argentina                       | -33.01 | -58.52 | M |
| <i>S. cinnamomea</i>   | MACN 3121   | 2006 | Iberá, Corrientes, Argentina                             | -27.86 | -56.70 | M |
| <i>S. cinnamomea</i>   | MACN 3122   | 2007 | Guauguaychú, Entre Ríos, Argentina                       | -33.01 | -58.52 | M |
| <i>S. cinnamomea</i>   | MACN 5192   | 2009 | Iberá, Corrientes, Argentina                             | -27.86 | -56.70 | M |
| <i>S. hypochroma</i>   | MACN 3131   | 2007 | Guauguaychú, Entre Ríos, Argentina                       | -33.01 | -58.52 | M |
| <i>S. hypochroma</i>   | MACN 5229   | 2009 | Iberá, Corrientes, Argentina                             | -27.86 | -56.70 | M |
| <i>S. hypochroma</i>   | MZUSP SP25  | -    | Captive; Brazil                                          | -      | -      | M |



|                      |             |      |                                                       |        |        |   |
|----------------------|-------------|------|-------------------------------------------------------|--------|--------|---|
| <i>S. ruficollis</i> | MACN 3128   | 2007 | Guauguaychú, Entre Ríos, Argentina                    | -33.01 | -58.52 | M |
| <i>S. ruficollis</i> | MACN 3129   | 2007 | Guauguaychú, Entre Ríos, Argentina                    | -33.01 | -58.52 | M |
| <i>S. ruficollis</i> | MACN 3130   | 2007 | Argentina                                             | -      | -      | M |
| <i>S. nigrorufa</i>  | MZUSP 98660 | 2014 | Vila Bela Da Santíssima Trindade, Mato Grosso, Brazil | -15.05 | -59.92 | M |
| <i>S. nigrorufa</i>  | MZUSP 98639 | 2014 | Vila Bela Da Santíssima Trindade, Mato Grosso, Brazil | -15.05 | -59.92 | M |
| <i>S. nigrorufa</i>  | MZUSP 98590 | 2014 | Vila Bela Da Santíssima Trindade, Mato Grosso, Brazil | -15.05 | -59.92 | M |
| <i>S. nigrorufa</i>  | MZUSP 98661 | 2014 | Vila Bela Da Santíssima Trindade, Mato Grosso, Brazil | -15.05 | -59.92 | M |
| <i>S. nigrorufa</i>  | MZUSP 98662 | 2014 | Vila Bela Da Santíssima Trindade, Mato Grosso, Brazil | -15.05 | -59.92 | M |
| <i>S. nigrorufa</i>  | MZUSP 98637 | 2014 | Vila Bela Da Santíssima Trindade, Mato Grosso, Brazil | -15.05 | -59.92 | M |
| <i>S. nigrorufa</i>  | MCP 4719    | 2014 | Vila Bela Da Santíssima Trindade, Mato Grosso, Brazil | -15.05 | -59.92 | M |
| <i>S. nigrorufa</i>  | MCP 4720    | 2014 | Vila Bela Da Santíssima Trindade, Mato Grosso, Brazil | -15.05 | -59.92 | M |
| <i>S. nigrorufa</i>  | MCP 4723    | 2014 | Vila Bela Da Santíssima Trindade, Mato Grosso, Brazil | -15.05 | -59.92 | M |
| <i>S. nigrorufa</i>  | MCP 4724    | 2014 | Vila Bela Da Santíssima Trindade, Mato Grosso, Brazil | -15.05 | -59.92 | M |
| <i>S. nigrorufa</i>  | MCP 4725    | 2014 | Vila Bela Da Santíssima Trindade, Mato Grosso, Brazil | -15.05 | -59.92 | M |
| <i>S. nigrorufa</i>  | MCP 4727    | 2014 | Vila Bela Da Santíssima Trindade, Mato Grosso, Brazil | -15.05 | -59.92 | M |

<sup>a</sup>MZUSP, Museu de Zoologia da Universidade de São Paulo; KUNHM, University of Kansas Museum of Natural History; MCP, Coleção de Aves do Museu de Ciências e Tecnologia da Pontifícia Universidad Católica do Rio Grande do Sul; MACN, Museo Argentino de Ciencias Naturales “Bernardino Rivadavia”.
